# Supplementary material for: Source-explicit estimation of brown carbon in the polluted atmosphere over North China Plain: implications for distribution, absorption and direct radiative effect
Source: Copernicus journal article supplement (doi:10.5194/egusphere-2024-3468), 2024-12-11
Supplement: Supplementary file 2 [file egusphere-2024-3468-supplement.pdf]

## 1 **S1 WRF-Chem model and configuration**

### 2 **S1.1 WRF-Chem model general description**

3 In this study, a specific version of the WRF-Chem model (Grell et al., 2005) with modified by Li et  
4 al. (2010; 2011a; 2011b; 2012) is used to quantitatively estimate the radiative effect of brown carbon in  
5 the NCP. The model was run at a horizontal resolution of 6km with 35 vertical levels, and configured  
6 with a single domain (no nesting) of 300×300 grid cells centered at grid point at latitude of 38.0 N and  
7 longitude of 116.0 W as shown in Table S1. The model contains a new flexible gas phase chemical  
8 module which utilized with SAPRC chemistry mechanism based on the available emission inventory in  
9 the present study. The gas-phase chemistry is solved by an Eulerian backward Gauss-Seidel iterative  
10 technique with a number of iterations, inherited from NCAR-HANK (Hess et al., 2000).

11 For the aerosol simulations, the CMAQ/models3 aerosol module (AERO5) developed by US EPA  
12 has incorporated into the model (Binkowski and Roselle, 2003). The particle size distribution is  
13 represented as the superposition of three lognormal modes. The processes of coagulation, particles  
14 growth by the addition of mass, and new particle formation are included. The wet deposition follows the  
15 method in the CMAQ module and the dry deposition of chemical species is parameterized following  
16 Wesely (1989). The photolysis rates are calculated using the Fast Tropospheric Ultraviolet and Visible  
17 (FTUV) Radiation Model ((Tie, 2003; Li et al., 2005) , with the aerosol and cloud effects on the  
18 photochemistry (Li et al., 2011a). The inorganic aerosols is predicted with ISORROPIA (version 1.7)  
19 (Nenes et al., 1998) which calculates the thermodynamic equilibrium between the ammonia-sulfate-  
20 nitrate-chloride-water aerosols and their gas phase precursors of H<sub>2</sub>SO<sub>4</sub>-HNO<sub>3</sub>-NH<sub>3</sub>-HCl-water vapor.

21 The organic aerosol (OA) module is based on the volatility basis-set (VBS) approach with aging  
22 (Li et al., 2011b). The primary organic aerosol (POA) are assumed semi-volatile and photochemically  
23 reactive (Robinson et al., 2007) and distributed in logarithmically spaced volatility bins. , 2008). Nine  
24 surrogate species are used for POA components followed by Shrivastava et al. (2008) with saturation  
25 concentrations (C\*) ranging from 10<sup>-2</sup> to 10<sup>6</sup> μg m<sup>-3</sup> at room temperature. The secondary organic aerosol  
26 (SOA) formation from each anthropogenic or biogenic precursor is calculated using four semi-volatile  
27 VOCs with effective saturation concentrations of 1, 10, 100, and 1000 μg m<sup>-3</sup> at 298 K. The SOA  
28 formation via the heterogeneous reaction of glyoxal and methylglyoxal is parameterized as a first-order

29 irreversible uptake by aerosol particles with an uptake coefficient of  $3.7 \times 10^{-3}$  (Liggio, 2005; Zhao et al.,  
 30 2006; Volkamer et al., 2007). The OA module has reasonably reproduced the POA and SOA  
 31 concentration against measurements, and detailed model performance can be found in Li et al. (2011b),  
 32 Feng et al. (2016), and Xing et al. (2019).

33 **Table S1 WRF-Chem model configurations.**

| <b>Parameter</b>                               | <b>Configuration</b>                                                                                                                  |
|------------------------------------------------|---------------------------------------------------------------------------------------------------------------------------------------|
| Regions                                        | The North China Plain (NCP)                                                                                                           |
| Simulation period                              | January 1 to 30, 2014                                                                                                                 |
| Domain size                                    | 300 × 300                                                                                                                             |
| Domain center                                  | 38.0°N, 116.0°E                                                                                                                       |
| Horizontal resolution                          | 6km × 6km                                                                                                                             |
| Vertical resolution                            | 35 vertical levels with a stretched vertical grid with spacing ranging from 30m near the surface, to 500m at 2.5km and 1km above 14km |
| Microphysics scheme                            | WSM 6-class graupel scheme (Hong and Lim, 2006)                                                                                       |
| Boundary layer scheme                          | MYJ TKE scheme (Janjić, 2002)                                                                                                         |
| Surface layer scheme                           | MYJ surface scheme (Janjić, 2002)                                                                                                     |
| Land-surface scheme                            | Unified Noah land-surface model (Chen and Dudhia, 2001)                                                                               |
| Long-wave radiation scheme                     | Goddard longwave scheme (Chou et al., 2001)                                                                                           |
| Short-wave radiation scheme                    | Goddard shortwave scheme (Chou and Suarez, 1999)                                                                                      |
| Meteorological boundary and initial conditions | NCEP 1°×1° reanalysis data                                                                                                            |
| Chemical initial and boundary conditions       | MOZART 6-hour output (Horowitz et al., 2003)                                                                                          |
| Anthropogenic emission inventory               | SAPRC-99 chemical mechanism emissions developed by Zhang et al. (2009) and Li et al. (2017)                                           |
| Biogenic emission inventory                    | MEGAN model developed by Guenther et al. (2006)                                                                                       |
| Four-dimension data assimilation               | NCEP ADP Global Air Observational Weather Data                                                                                        |
| Model spin-up time                             | 24 hours                                                                                                                              |

34

### 35 **S1.2 Aerosol radiative module**

36 Aerosols in the model are represented by a three-moment approach with lognormal size distribution.  
 37 The spectrum of aerosol size is divided into 48 bins from 0.002 μm to 10 μm followed by Li et al.,  
 38 (2011a). The aerosols are categorized into four types and are assumed to be mixed externally. For  
 39 internally mixed aerosols, the complex refractive index at a specific wavelength ( $\lambda$ ) is derived from the  
 40 volume-weighted average of each component's refractive index. Optical properties such as extinction  
 41 efficiency, single scattering albedo (SSA), and asymmetry factor are then computed using Mie theory for  
 42 the specified wavelength, utilizing look-up tables that correlate particle sizes and refractive indices to  
 43 linearly calculations and avoid repetitive Mie scattering computations.

44 The aerosol optical depth (AOD or  $\tau_a$ ), single scattering albedo (SSA or  $\omega_a$ ), and the asymmetry  
 45 factor ( $g_a$ ) at a given wavelength  $\lambda$  in a given atmospheric layer  $k$  is calculated by the summation  
 46 over all types of aerosols and all bins (Li et al., 2011a) as below:

$$47 \tau_a(\lambda, k) = \sum_{i=1}^{48} \sum_j^4 Q_e(\lambda, r_i, j, k) \pi r_i^2 n(r_i, j, k) \Delta Z_k \quad (1)$$

$$48 \omega_a(\lambda, k) = \frac{\sum_{i=1}^{48} \sum_j^4 Q_e(\lambda, r_i, j, k) \pi r_i^2 n(r_i, j, k) \omega_a(\lambda, r_i, j, k) \Delta Z_k}{\sum_{i=1}^{48} \sum_j^4 Q_e(\lambda, r_i, j, k) \pi r_i^2 n(r_i, j, k) \Delta Z_k} \quad (2)$$

$$49 g_a(\lambda, k) = \frac{\sum_{i=1}^{48} \sum_j^4 Q_e(\lambda, r_i, j, k) \pi r_i^2 n(r_i, j, k) \omega_a(\lambda, r_i, j, k) g_a(\lambda, r_i, j, k) \Delta Z_k}{\sum_{i=1}^{48} \sum_j^4 Q_e(\lambda, r_i, j, k) \pi r_i^2 n(r_i, j, k) \omega_a(\lambda, r_i, j, k) \Delta Z_k} \quad (3)$$

50 where  $n(r_i, j, k)$  is the number concentration of  $j$ -th kind of aerosols in  $i$ -th bin.  $\Delta Z_k$  is the depth of  
 51 an atmospheric layer.

## 52 **S2 Data and methodology**

### 53 **S2.1 Observation data description**

54 The hourly near-surface measurements of O<sub>3</sub>, NO<sub>2</sub>, SO<sub>2</sub>, CO and PM<sub>2.5</sub> concentrations have been  
 55 released in public by the Ministry of Ecology and Environment of China since 2013. The submicron  
 56 sulfate, nitrate, ammonium, elemental carbon and organic aerosols obtained in two cities including  
 57 Beijing, Tianjin and the hourly observation of primary OA from, BB, RCC and motor vehicles emissions  
 58 and SOA in Beijing in January, 2014 are provided by Institute of Earth Environment, Chinese Academy  
 59 of Sciences. The organic carbon and elemental carbon concentrations are measured using a  
 60 thermal/optical reflectance carbon analyzer (Model 2001, DRI, USA) (Chow et al., 2004) and water-  
 61 soluble ions are measured using a DX600 ion chromatograph (Dionex Inc., Sunnyvale, CA, USA)  
 62 (Zhang et al., 2011). The SWDOWN is measured by CM-11 pyranometers at five sites from Chinese  
 63 Ecosystem Research Network (CERN) in the NCP, including Beijing, Tianjin, Zhengzhou, Hefei, and  
 64 Ji'nan. The hourly measurement of OA in Beijing is measured by the Aerodyne high-resolution time-of-  
 65 flight aerosol mass spectrometer (HR-ToF-AMS) with a PM<sub>2.5</sub> lens from 9 to 25 January, 2014 at the  
 66 Institute of Remote Sensing and Digital Earth, Chinese Academy of Sciences (Li et al., 2018). The  
 67 positive matrix factorization (PMF) method is used to distinguish the sources of OA as hydrocarbon-like  
 68 OA, biomass burning OA, coal combustion OA (Elser et al., 2016), which are interpreted for surrogates  
 69 of primary OA (POA)-TRA, POA-BB, POA-COAL, and oxygenated OA is the surrogate of SOA in this  
 70 paper.

## 71 **S2.2 Statistical metrics for simulation comparisons**

72 In this study, the mean bias (MB), root mean square error (RMSE) and the index of agreement  
73 (IOA) are used to evaluate the model performance in simulating air pollutants.

$$74 \text{ MB} = \frac{1}{N} \sum_{i=1}^N (P_i - O_i) \quad (4)$$

$$75 \text{ RMSE} = \left[ \frac{1}{N} \sum_{i=1}^N (P_i - O_i)^2 \right]^{\frac{1}{2}} \quad (5)$$

$$76 \text{ IOA} = 1 - \frac{\sum_{i=1}^N (P_i - O_i)^2}{\sum_{i=1}^N (|P_i - \bar{O}| + |O_i - \bar{O}|)^2} \quad (6)$$

77 Where  $P_i$  and  $O_i$  are the simulated and observed variables, respectively.  $N$  is the total number of the  
78 simulations for comparisons, and  $\bar{O}$  donates the average of the observations. The IOA ranges from 0 to  
79 1, with 1 showing a perfect agreement of the simulations with the observations.

## 80 **S3 Model performance**

### 81 **S3.1 Air pollutants simulations in the NCP**

82 Comparison of observed (black dots) and simulated (solid blue lines) near-surface hourly mass  
83 concentrations of (a)  $\text{PM}_{2.5}$ , (b)  $\text{O}_3$ , (c)  $\text{NO}_2$ , (d)  $\text{SO}_2$ , and (d)  $\text{CO}$  averaged at available monitoring sites  
84 in the NCP from January 1 to January 30, 2014 is shown in Fig. S1. The model successfully reproduces  
85 the diurnal variation of near-surface  $\text{PM}_{2.5}$  concentrations in the NCP with an IOA of 0.91 and a slightly  
86 overestimation with a MB of  $2.8 \mu\text{g m}^{-3}$ . The model generally captures well the temporal variations of  
87 near-surface  $\text{O}_3$  concentrations compared to observations in the NCP with an IOA of 0.93 while a  
88 generally overestimates the  $\text{O}_3$  concentrations a MB of  $0.5 \mu\text{g m}^{-3}$ . The model also reasonably well yields  
89 the temporal variation of  $\text{NO}_2$ ,  $\text{SO}_2$  and  $\text{CO}$  compared with observation, with IOA and MB of 0.83 and -  
90  $3.7 \mu\text{g m}^{-3}$ , 0.75 and  $-13.0 \mu\text{g m}^{-3}$ , 0.86 and  $0.0 \mu\text{g m}^{-3}$ , respectively.

91 The spatial pattern of calculated and observed average near-surface concentrations of  $\text{PM}_{2.5}$ ,  $\text{SO}_2$ ,  
92  $\text{NO}_2$  and  $\text{O}_3$  along with simulated winds in January 2014 in the NCP is shown in Fig. S2. The simulations  
93 of four air pollutants distributions are general in good agreement with the observations in the NCP, while  
94 partly biases of modeling still exist. It shows that the air in the NCP in January 2014 is much polluted  
95 with the monthly near-surface  $\text{PM}_{2.5}$  concentrations over  $150 \mu\text{g m}^{-3}$ . The observed and simulated  
96 highest average near-surface  $\text{PM}_{2.5}$  concentrations are found in Beijing, Hebei, Henan, Shandong, north  
97 Anhui and north Jiangsu. Highest observed and simulated near-surface  $\text{SO}_2$  and  $\text{NO}_2$  concentrations  
98 almost occurs in same areas in the NCP. But simulated highest  $\text{SO}_2$  concentrations are mainly

99 concentrated around cities, while the distribution of  $\text{NO}_2$  shows more area uniformly which likely due to  
100 their sources are different, the former mainly emits from point sources and the latter mainly comes from  
101 more area sources. The simulated  $\text{O}_3$  concentrations are rather low in the NCP which is consistent with  
102 measurements.

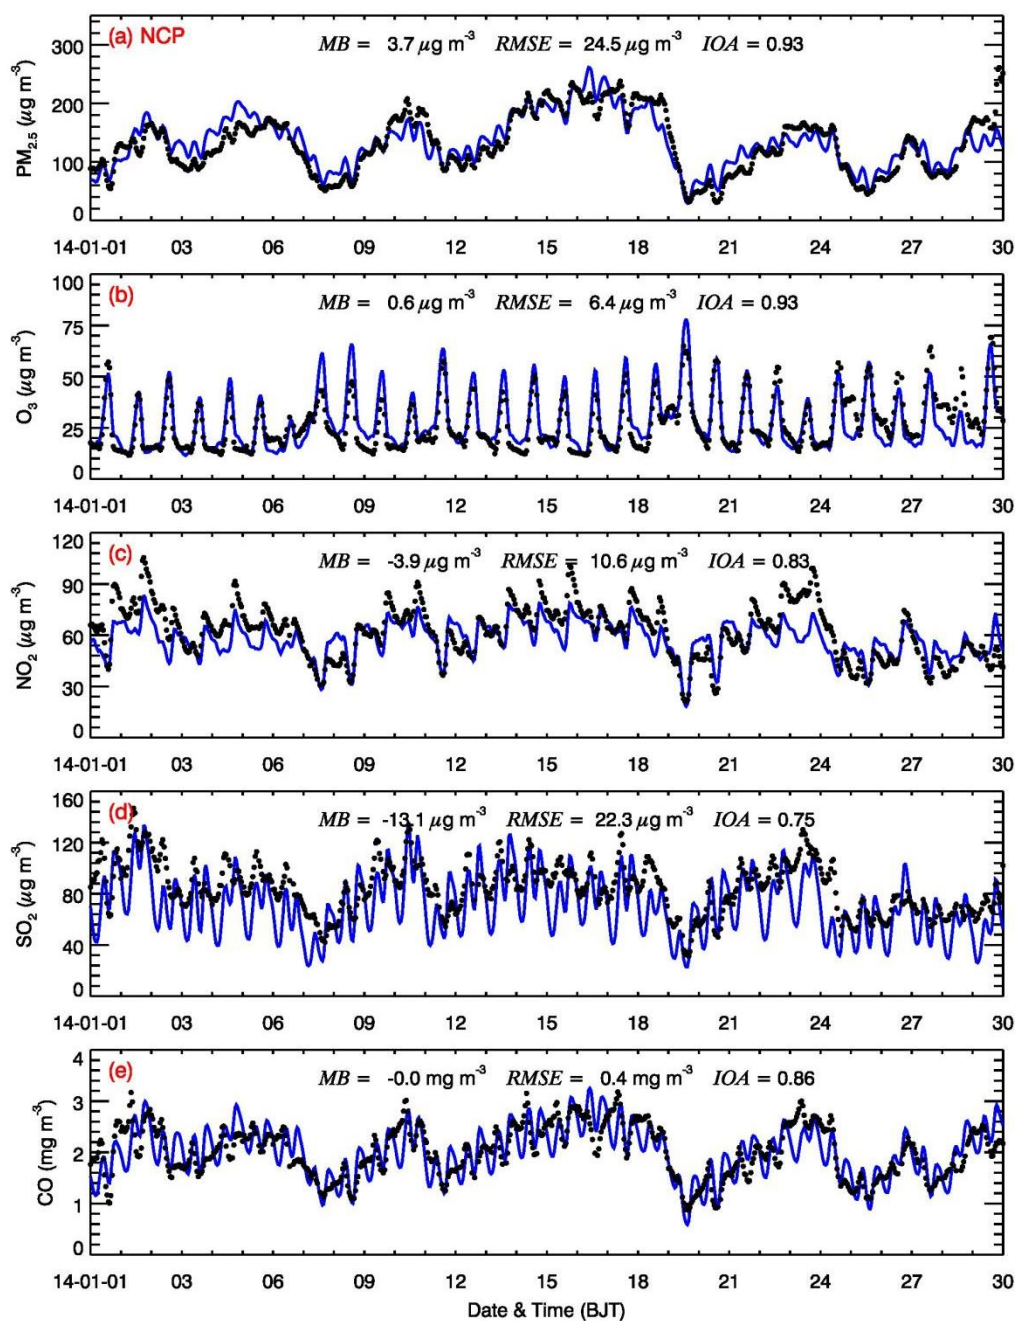

103  
104 **Figure S1. Comparison of observed (black dots) and simulated (blue lines) diurnal profiles of near-surface**  
105 **hourly mass concentrations of (a)  $\text{PM}_{2.5}$ , (b)  $\text{O}_3$ , (c)  $\text{NO}_2$ , (d)  $\text{SO}_2$ , and (d)  $\text{CO}$  averaged at monitoring sites in**  
106 **the NCP from January 1 to January 30, 2014.**

107

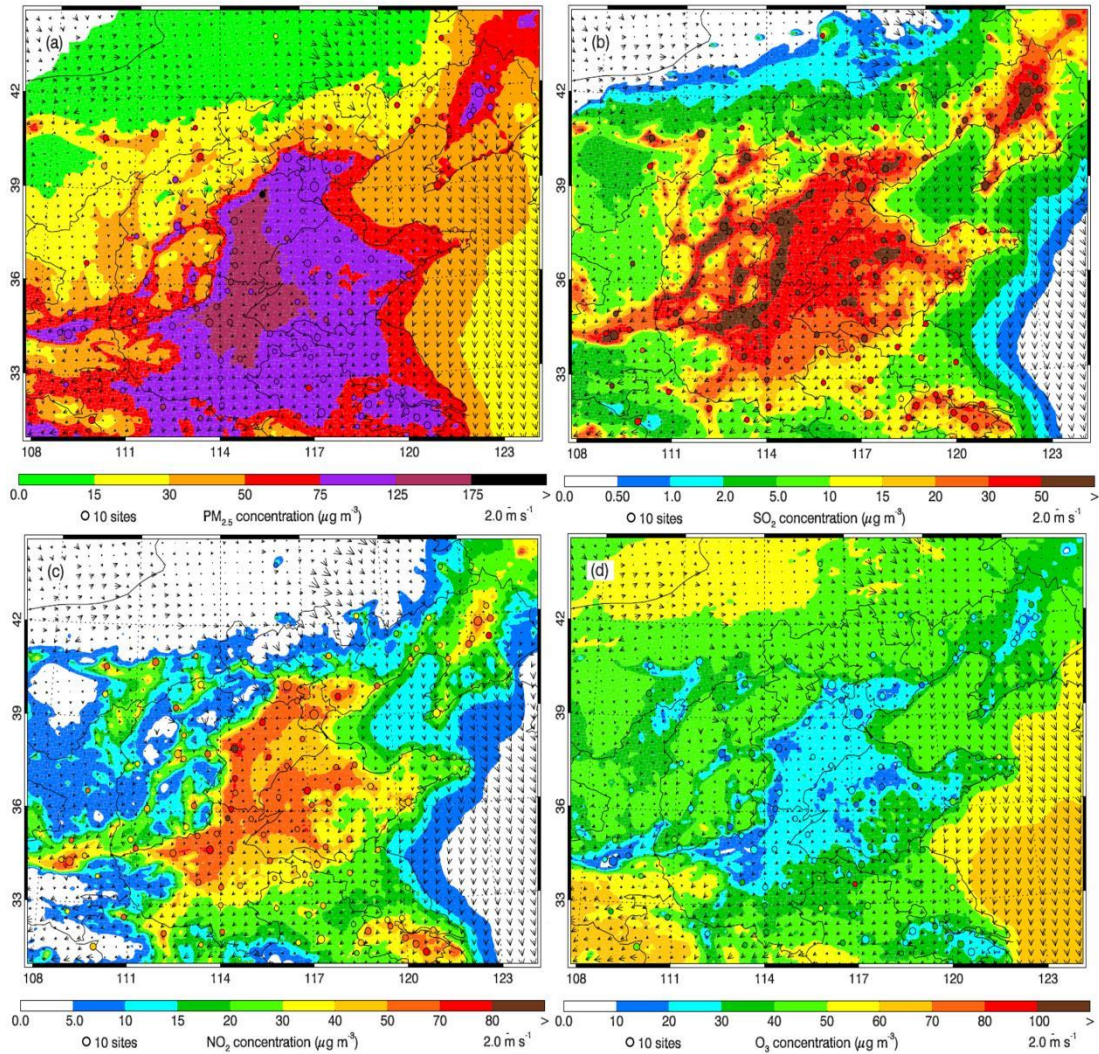

108  
 109 **Figure S2. Pattern comparisons of simulated (color counters) vs. observed (colored circles) near-surface mass**  
 110 **concentrations of (a) PM<sub>2.5</sub>, (b) SO<sub>2</sub>, (c) NO<sub>2</sub>, and (d) O<sub>3</sub> averaged in January 2014. The black arrows indicate**  
 111 **simulated surface winds.**

112 Figure S3 provides the time series variations of simulated and observed aerosol species including  
 113 OA (1.6 times of measurement OC), EC, ammonium, sulfate, and nitrate at Beijing and Tianjin city from  
 114 January 1 to January 30, 2014. It shows that the WRF-Chem model generally predicts the temporal  
 115 variations of the aerosol species against the field measurements reasonably with relatively high IOA  
 116 value. The model yields the main peaks of aerosol species but with some frequently underestimates or  
 117 overestimates which is mostly linked to the uncertainty of emission inventory and meteorological  
 118 variations.

119  
 120  
 121

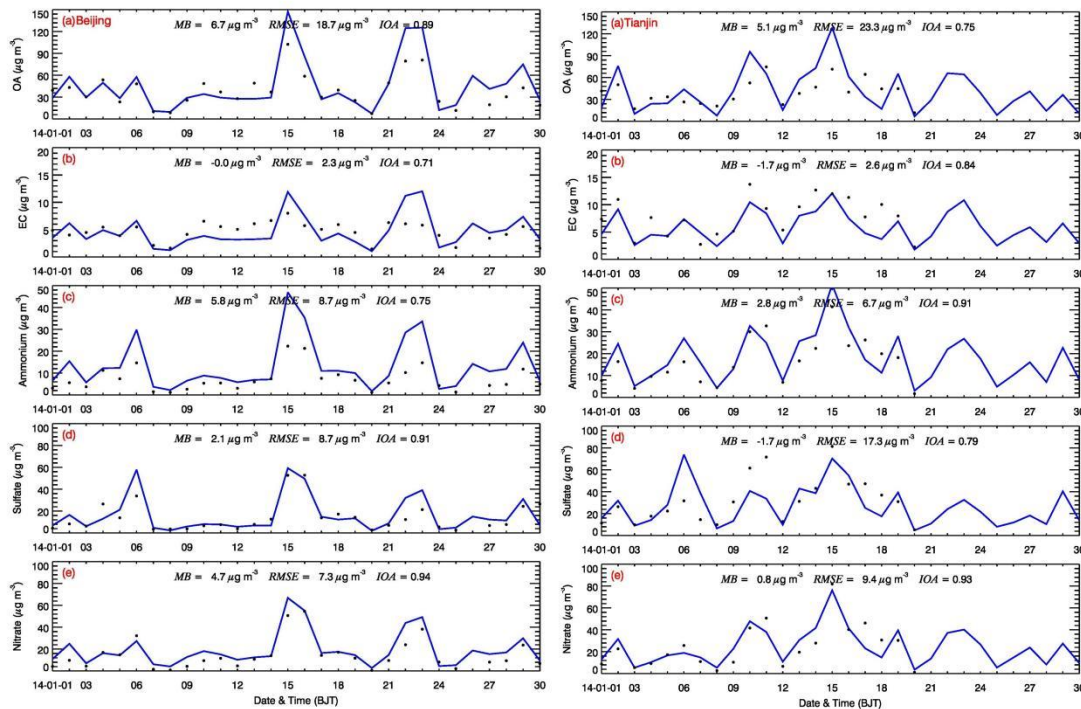

122

123 **Figure S3. Comparison of measured (black dots) and simulated (blue lines) daily profiles of submicron aerosol**  
 124 **species of (a) OA, (b) EC, (c) ammonium, (d) sulfate, and (e) nitrate at two sites (Beijing and Tianjin) in the**  
 125 **NCP from January 1 to January 30, 2014.**

126

### S3.2 Downward shortwave flux comparison

127

Figure S4 shows the comparison of measured (black dots) and simulated (blue lines) diurnal profiles  
 128 of the SWDOWN reaching the ground surface in (a) Beijing, (b) Tianjin, (c) Zhengzhou, (d) Hefei, and  
 129 (e) Ji'nan from 01 January 2014 to 30 January 2014. Although the MB and RMSE values suggest bias in  
 130 the model performance, but in overall, the model generally captures the diurnal patterns quite well, as  
 131 reflected by the average IOA values up to 0.95 across all five cities. The biases of SWDOWN between  
 132 model and field study may be caused by the cloud cover and optical thickness calculation in the model,  
 133 which is due to the horizontal resolution of the model is insufficient to resolve the cumulus clouds.

134

135

136

137

138

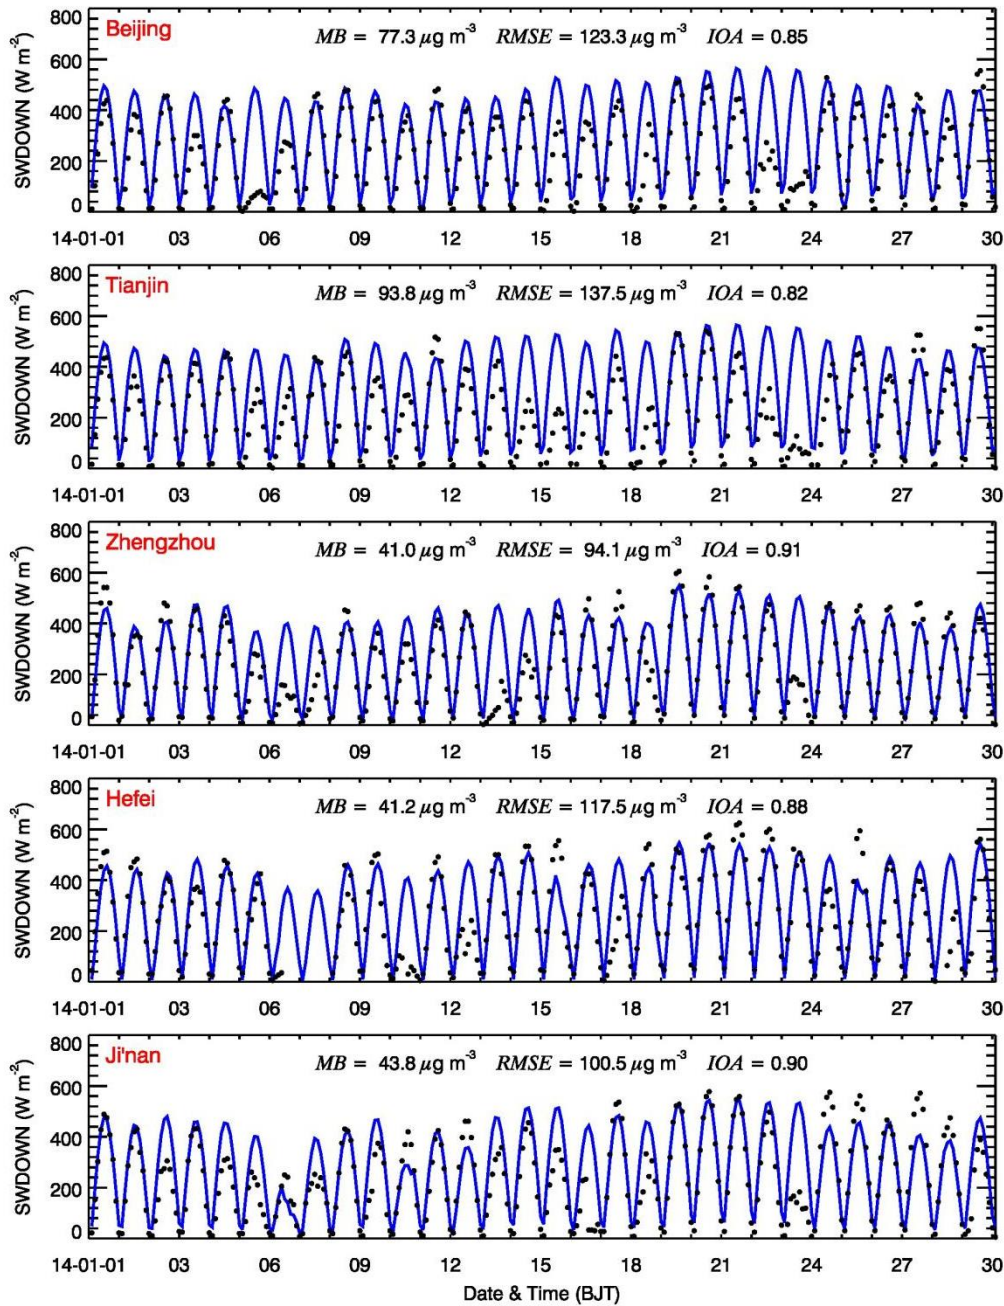

139

140 **Figure S4. Comparison of measured (black dots) and simulated (blue lines) diurnal profiles**  
 141 **of the SWDOWN reaching the ground surface in (a) Beijing, (b) Tianjin, (c) Zhengzhou, (d)**  
 142 **Hefei, and (e) Ji'nan from January 1 to January 30, 2014.**

143 **S3.3 OA from different sources comparison in Beijing**

144 Figure S5 presents a comparative analysis of temporal profiles of measured and simulated OA, POA  
 145 from coal combustion (POA-COAL), biomass burning combustion (POA-BB), POA from vehicle  
 146 exhaust (POA-TRA) and SOA in Beijing from January 9 to 25, 2014. The model shows a good fit with



147 observed data with an IOA of 0.85, suggesting a reasonably accurate representation of OA variations,  
148 despite some discrepancies in peak values and slightly overestimates as indicated by an RMSE of 33.1  
149  $\mu\text{g}/\text{m}^3$  and an MB of 5.0  $\mu\text{g}/\text{m}^3$ , respectively. The model also generally tracks the measured diurnal  
150 variations in POA-COAL mass concentrations, with an IOA of 0.81. The model frequently  
151 underestimates or overestimates the POA-COAL mass concentrations and is also subject to missing the  
152 observed POA-COAL peaks. The POA-COAL is mainly emitted from industries and residential coal  
153 combustion. In general, the POA-COAL emissions from industries have clear diurnal variations but are  
154 opposite for those from residential coal combustion, causing large model biases for the POA-COAL  
155 simulation. The model performs well in capturing the general trend of POA-BB with an IOA of 0.86 and  
156 a lower RMSE of 4.0  $\mu\text{g}/\text{m}^3$ , while POA-Tra has a lower IOA of 0.56. Although the model captured the  
157 major vehicle pollution events, some smaller peaks were not well reflected in the model. Modeled SOA  
158 shows a fair correlation with observed data (IOA of 0.73) but also exhibits some of the higher variance  
159 in peak concentrations, reflected in an RMSE of 11.3  $\mu\text{g}/\text{m}^3$ . In general, the IOA values of all types of  
160 OA suggest a reasonable model performance, particularly in capturing the temporal dynamics with some  
161 quantitative in accuracies which largely associated with the influence of meteorological conditions and  
162 emission sources uncertainties.

163

164

165

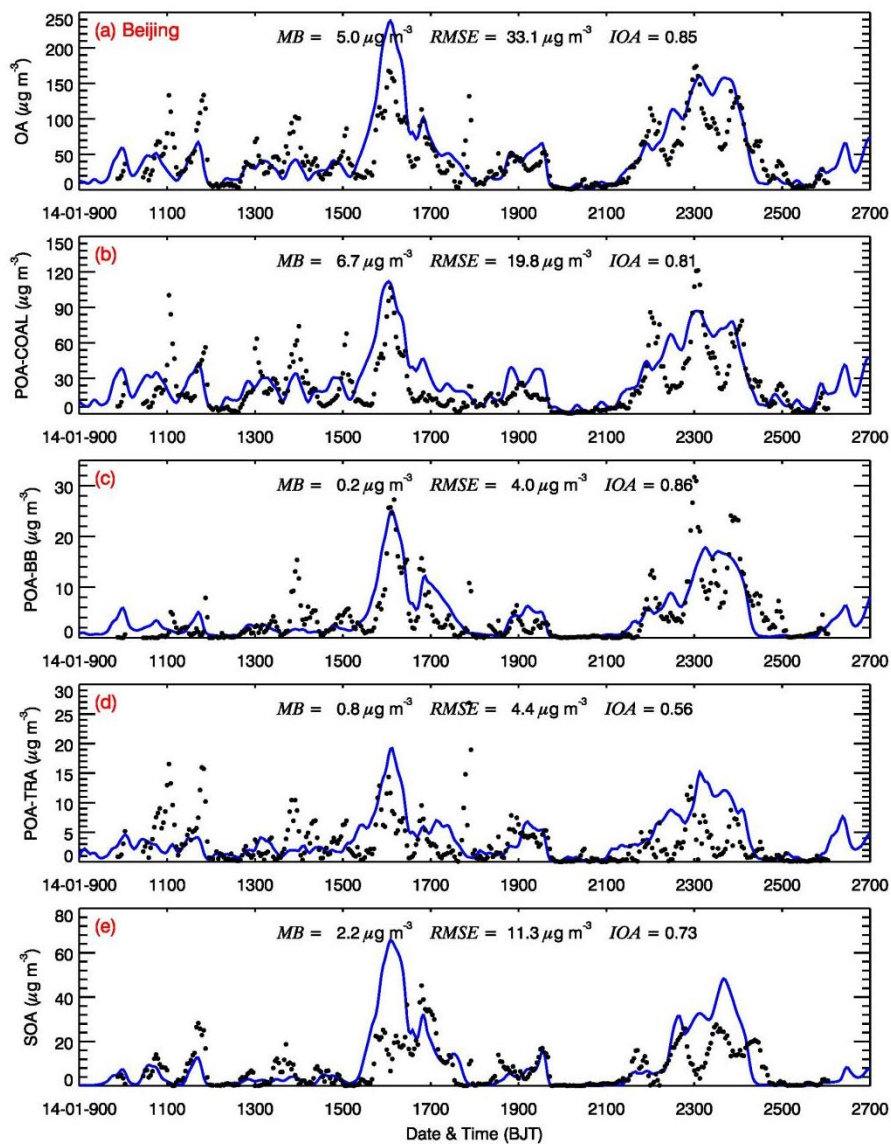

166

167

Figure S5. Temporal profiles of measured (black dots) and simulated (blue lines) OA (a), POA-Coal (b), POA-BB (c), POA-Tra (d) and SOA (e) in Beijing from January 9 to 25, 2014.

169

170 **References**

- 171 Binkowski, F. S. and Roselle, S. J.: Models-3 Community Multiscale Air Quality (CMAQ) model aerosol  
172 component 1. Model description, *J. Geophys. Res.*, 108, 479, <https://doi.org/10.1029/2001JD001409>,  
173 2003.
- 174 Chen, F. and Dudhia, J.: Coupling an Advanced Land Surface–Hydrology Model with the Penn State–  
175 NCAR MM5 Modeling System. Part I: Model Implementation and Sensitivity, *Mon. Wea. Rev.*, 129,  
176 569–585, [https://doi.org/10.1175/1520-0493\(2001\)129<0569:CAALSH>2.0.CO;2](https://doi.org/10.1175/1520-0493(2001)129<0569:CAALSH>2.0.CO;2), 2001.
- 177 Chou, M. D. and Suarez, M. J.: A solar radiation parameterization for atmospheric studies, NASA  
178 Technique Report, Greenbelt, USA, NASA/TM-1999-104606/VOL15, 1999.
- 179 Chou, M. D., Suarez, M. J., Liang, X. Z., Yan, M. H., and Cote, C.: A Thermal Infrared Radiation  
180 Parameterization for Atmospheric Studies, NASA Technique Report, Greenbelt, USA, NASA/TM-2001-  
181 104606/VOL19, 2001.
- 182 Chow, J. C., Watson, J. G., Chen, L. W. A., Arnott, W. P., Moosmüller, H., and Fung, K.: Equivalence of  
183 elemental carbon by thermal/optical reflectance and transmittance with different temperature protocols,  
184 *Environmental science & technology*, 38, 4414–4422, <https://doi.org/10.1021/es034936u>, 2004.
- 185 Elser, M., Huang, R.-j., Wolf, R., Slowik, J. G., Wang, Q., Canonaco, F., Li, G., Bozzetti, C., Daellenbach,  
186 K. R., Huang, Y., Zhang, R., Li, Z., Cao, J., Baltensperger, U., El-Haddad, I., and Prévôt, A. S. H.: New  
187 insights into PM<sub>2.5</sub> chemical composition and sources in two major cities in China during extreme haze  
188 events using aerosol mass spectrometry, *Atmos. Chem. Phys.*, 16, 3207–3225,  
189 <https://doi.org/10.5194/acp-16-3207-2016>, 2016.
- 190 Feng, T., Li, G., Cao, J., Bei, N., Shen, Z., Zhou, W., Liu, S., Zhang, T., Wang, Y., Huang, R.-j., Tie, X.,  
191 and Molina, L. T.: Simulations of organic aerosol concentrations during springtime in the Guanzhong  
192 Basin, China, *Atmos. Chem. Phys.*, 16, 10045–10061, <https://doi.org/10.5194/acp-16-10045-2016>, 2016.
- 193 Grell, G. A., Peckham, S. E., Schmitz, R., McKeen, S. A., Frost, G., Skamarock, W. C., and Eder, B.:  
194 Fully coupled “online” chemistry within the WRF model, *Atmospheric Environment*, 39, 6957–6975,  
195 <https://doi.org/10.1016/j.atmosenv.2005.04.027>, 2005.
- 196 Guenther, A., Karl, T., Harley, P., Wiedinmyer, C., Palmer, P. I., and Geron, C.: Estimates of global  
197 terrestrial isoprene emissions using MEGAN (Model of Emissions of Gases and Aerosols from Nature),  
198 *Atmos. Chem. Phys.*, 6, 3181–3210, <https://doi.org/10.5194/acp-6-3181-2006>, 2006.
- 199 Hess, P. G., Flocke, S., Lamarque, J.-F., Barth, M. C., and Madronich, S.: Episodic modeling of the  
200 chemical structure of the troposphere as revealed during the spring MLOPEX 2 intensive, *J. Geophys.*  
201 *Res.*, 105, 26809–26839, <https://doi.org/10.1029/2000JD900253>, 2000.
- 202 Hong, S. Y. and Lim, J.O.J.: The WRF single-moment 6-class microphysics scheme (WSM6), *Asia*  
203 *Pacific Journal of Atmospheric Sciences*, 42, 129–151, 2006.
- 204 Horowitz, L. W., Walters, S., Mauzerall, D. L., Emmons, L. K., Rasch, P. J., Granier, C., Tie, X.,  
205 Lamarque, J.-F., Schultz, M. G., Tyndall, G. S., Orlando, J. J., and Brasseur, G. P.: A global simulation  
206 of tropospheric ozone and related tracers: Description and evaluation of MOZART, version 2, *J. Geophys.*  
207 *Res.*, 108, n/a-n/a, <https://doi.org/10.1029/2002JD002853>, 2003.
- 208 Janjić, Z. I.: Nonsingular Implementation of the Mellor-Yamada Level 2.5 Scheme in the NCEP Meso  
209 Model, 437, Ncep Office Note, Camp Springs, USA, 2002.
- 210 Li, G., Lei, W., Bei, N., and Molina, L. T.: Contribution of garbage burning to chloride and PM<sub>2.5</sub> in  
211 Mexico City, *Atmos. Chem. Phys.*, 12, 8751–8761, <https://doi.org/10.5194/acp-12-8751-2012>, 2012.

212 Li, G., Bei, N., Tie, X., and Molina, L. T.: Aerosol effects on the photochemistry in Mexico City during  
213 MCMA-2006/MILAGRO campaign, *Atmos. Chem. Phys.*, 11, 5169–5182, [https://doi.org/10.5194/acp-](https://doi.org/10.5194/acp-11-5169-2011)  
214 11-5169-2011, 2011a.

215 Li, G., Zavala, M., Lei, W., Tsimpidi, A. P., Karydis, V. A., Pandis, S. N., Canagaratna, M. R., and Molina,  
216 L. T.: Simulations of organic aerosol concentrations in Mexico City using the WRF-CHEM model during  
217 the MCMA-2006/MILAGRO campaign, *Atmos. Chem. Phys.*, 11, 3789–3809,  
218 <https://doi.org/10.5194/acp-11-3789-2011>, 2011b.

219 Li, G., Lei, W., Zavala, M., Volkamer, R., Dusanter, S., Stevens, P., and Molina, L. T.: Impacts of HONO  
220 sources on the photochemistry in Mexico City during the MCMA-2006/MILAGO Campaign, *Atmos.*  
221 *Chem. Phys.*, 10, 6551–6567, <https://doi.org/10.5194/acp-10-6551-2010>, 2010.

222 Li, G., Bei, N., Cao, J., Wu, J., Long, X., Feng, T., Dai, W., Liu, S., Zhang, Q., and Tie, X.: Widespread  
223 and persistent ozone pollution in eastern China during the non-winter season of 2015: observations and  
224 source attributions, *Atmos. Chem. Phys.*, 17, 2759–2774, <https://doi.org/10.5194/acp-17-2759-2017>,  
225 2017.

226 Li, G., Zhang, R., Fan, J., and Tie, X.: Impacts of black carbon aerosol on photolysis and ozone, *J.*  
227 *Geophys. Res.*, 110, 1042, <https://doi.org/10.1029/2005JD005898>, 2005.

228 Li, X., Wu, J., Elser, M., Feng, T., Cao, J., El-Haddad, I., Huang, R., Tie, X., Prévôt, A. S. H., and Li, G.:  
229 Contributions of residential coal combustion to the air quality in Beijing–Tianjin–Hebei (BTH), China:  
230 a case study, *Atmos. Chem. Phys.*, 18, 10675–10691, <https://doi.org/10.5194/acp-18-10675-2018>, 2018.

231 Liggio, J.: Reactive uptake of glyoxal by particulate matter, *J. Geophys. Res.*, 110, 881,  
232 <https://doi.org/10.1029/2004jd005113>, 2005.

233 Nenes, A., Pandis, S. N., and Pilinis Christodoulos: ISORROPIA: A New Thermodynamic Equilibrium  
234 Model for Multiphase Multicomponent Inorganic Aerosols, *Aquatic Geochemistry*, 4, 123–152, 1998.

235 Robinson, A. L., Donahue, N. M., Shrivastava, M. K., Weitkamp, E. A., Sage, A. M., Grieshop, A. P.,  
236 Lane, T. E., Pierce, J. R., and Pandis, S. N.: Rethinking organic aerosols: semivolatile emissions and  
237 photochemical aging, *Science* (New York, N.Y.), 315, 1259–1262,  
238 <https://doi.org/10.1126/science.1133061>, 2007.

239 Shrivastava, M. K., Lane, T. E., Donahue, N. M., Pandis, S. N., and Robinson, A. L.: Effects of gas  
240 particle partitioning and aging of primary emissions on urban and regional organic aerosol concentrations,  
241 *J. Geophys. Res.*, 113, 2701, <https://doi.org/10.1029/2007jd009735>, 2008.

242 Tie, X.: Effect of clouds on photolysis and oxidants in the troposphere, *J. Geophys. Res.*, 108, 23,073,  
243 <https://doi.org/10.1029/2003JD003659>, 2003.

244 Volkamer, R., San Martini, F., Molina, L. T., Salcedo, D., Jimenez, J. L., and Molina, M. J.: A missing  
245 sink for gas-phase glyoxal in Mexico City: Formation of secondary organic aerosol, *Geophys. Res. Lett.*,  
246 34, 641, <https://doi.org/10.1029/2007GL030752>, 2007.

247 Wesely, M. L.: Parameterization of surface resistances to gaseous dry deposition in regional-scale  
248 numerical models, *Atmospheric Environment* (1967), 23, 1293–1304, [https://doi.org/10.1016/0004-](https://doi.org/10.1016/0004-6981(89)90153-4)  
249 6981(89)90153-4, 1989.

250 Xing, L., Wu, J., Elser, M., Tong, S., Liu, S., Li, X., Liu, L., Cao, J., Zhou, J., El-Haddad, I., Huang, R.,  
251 Ge, M., Tie, X., Prévôt, A. S. H., and Li, G.: Wintertime secondary organic aerosol formation in Beijing–  
252 Tianjin–Hebei (BTH): Contributions of HONO sources and heterogeneous reactions, *Atmos. Chem.*  
253 *Phys.*, 19, 2343–2359, <https://doi.org/10.5194/acp-19-2343-2019>, 2019.

254 Zhang, Q., Streets, D. G., Carmichael, G. R., He, K. B., Huo, H., Kannari, A., Klimont, Z., Park, I. S.,  
255 Reddy, S., Fu, J. S., Chen, D., Duan, L., Lei, Y., Wang, L. T., and Yao, Z. L.: Asian emissions in 2006 for

256 the NASA INTEX-B mission, *Atmos. Chem. Phys.*, 9, 5131–5153, [https://doi.org/10.5194/acp-9-5131-](https://doi.org/10.5194/acp-9-5131-2009)  
257 2009, 2009.

258 Zhang, T., Cao, J. J., Tie, X. X., Shen, Z. X., Liu, S. X., Ding, H., Han, Y. M., Wang, G. H., Ho, K. F.,  
259 Qiang, J., and Li, W. T.: Water-soluble ions in atmospheric aerosols measured in Xi'an, China: Seasonal  
260 variations and sources, *Atmospheric Research*, 102, 110–119,  
261 <https://doi.org/10.1016/j.atmosres.2011.06.014>, 2011.

262 Zhao, J., Levitt, N. P., Zhang, R., and Chen, J.: Heterogeneous reactions of methylglyoxal in acidic media:  
263 Implications for secondary organic aerosol formation, *Environmental science & technology*, 40, 7682–  
264 7687, <https://doi.org/10.1021/es060610k>, 2006.

265
